# Supplementary material
Source: Springer Nature journal article supplement (https://www.springermedizin.de/resource/supplementary/12880_2013_214_MOESM10_ESM.pdf/9450316)

## Area and Extent Thresholds for Object Classification

Effect on Sensitivity

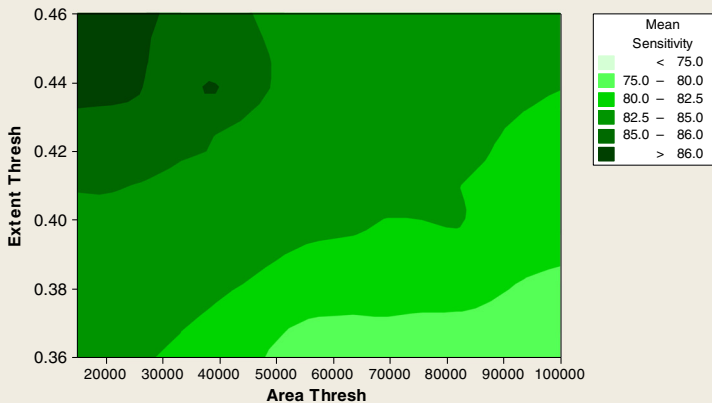

## Area and Extent Thresholds for Object Classification

Effect on Specificity

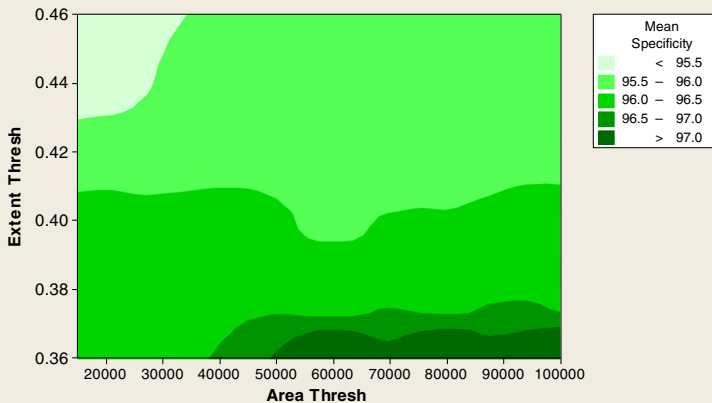

Supplement: MOESM10 [file 9450316]
